# Supplementary material for: Recent progress in single-phase molecular multiferroic materials with ferroelectricity and ferroelasticity
Source: Royal Society of Chemistry journal article supplement (doi:10.1039/d5sc10231f), 2026-04-17
Supplement: d5sc10231f1.pdf [file d5sc10231f1.pdf]

## **Recent Progress in Single-phase Molecular Multiferroic Materials with Ferroelectricity and Ferroelasticity**

Meng-Meng Lun,<sup>a</sup> Meng-Meng Sun,<sup>a</sup> Yong-Qiang Wang,<sup>a</sup> Gao-Shang Gong,<sup>a</sup> Mao-Cai Wei,<sup>a</sup> Yu-Ling Su,<sup>a</sup> Da-Wei Fu<sup>\*b,c</sup>, Zun-Qi Liu,<sup>\*c</sup>

<sup>a</sup> School of Electronics and Information, Zhengzhou University of Light Industry, Zhengzhou 450000, China.

<sup>b</sup> Institute for Science and Applications of Molecular Ferroelectrics, Key Laboratory of the Ministry of Education for Advanced Catalysis Materials, Zhejiang Normal University, Jinhua 321019, China.

<sup>c</sup> Chemical Engineering College, Xinjiang Agricultural University, Urumqi 830052, China.

E-mail: dawei@seu.edu.cn, zunqi85@163.com

**Table S1** Other compounds reported to only exhibit ferroelectric properties

| Compound                                                                                                                               | n-D | component                                                                                                                                                               | Phase transition                                      | Polar/<br>strain<br>axis | $P_s$ ( $\mu\text{C}\cdot\text{cm}^{-2}$ ) | $\epsilon$ | Ref. |
|----------------------------------------------------------------------------------------------------------------------------------------|-----|-------------------------------------------------------------------------------------------------------------------------------------------------------------------------|-------------------------------------------------------|--------------------------|--------------------------------------------|------------|------|
| ( <i>R</i> )-3-quinuclidinol                                                                                                           | 0D  |                                                                                        | <b>622F6</b><br>( $P6_1 - P6_122$ ,<br>$T_c = 400$ K) | 1                        | 6.96                                       |            | 1    |
| ( <i>S</i> )-3-quinuclidinol                                                                                                           | 0D  |                                                                                        | <b>622F6</b><br>( $P6_5 - P6_522$ ,<br>$T_c = 396$ K) | 1                        | 6.72                                       |            | 1    |
| ( <i>R</i> )-(-)-3<br>hydroxyquinuclidiniu<br>m halides                                                                                | 0D  |                                                                                        | <b>432F4</b><br>( $P4_1 - F432$ ,<br>$T_c = 340$ K)   | 4                        | 2.4                                        |            | 2    |
| ( <i>R</i> )-DMFPI iodide<br>DMFPI = ( <i>N,N</i> -<br>dimethyl-3<br>fluoropyrrolidinium)                                              | 0D  |                                                                                        | <b>432F2</b><br>( $P2_1$ , $T_c = 470$ K)             | 6                        | 0.48                                       |            | 3    |
| ( <i>S</i> )-DMFPI iodide<br>DMFPI = ( <i>N,N</i> -<br>dimethyl-3<br>fluoropyrrolidinium)                                              | 0D  |                                                                                       | <b>432F2</b><br>( $P2_1$ , $T_c = 470$ K)             | 6                        | 0.40                                       |            | 3    |
| ( <i>R</i> )-3<br>(Fluoropyrrolidinium)<br>$\text{MnCl}_3$                                                                             | 1D  |   | <b>222F2</b><br>( $C222_1 - P2_1$ ,<br>$T_c = 333$ K) | 1                        | 5                                          |            | 4    |
| ( <i>S</i> )-3<br>(Fluoropyrrolidinium)<br>$\text{MnCl}_3$                                                                             | 1D  |   | <b>222F2</b><br>( $C222_1 - P2_1$ ,<br>$T_c = 333$ K) | 1                        | 5.8                                        |            | 4    |
| ( <i>R</i> )-3<br>(Fluoropyrrolidinium)<br>$\text{CdCl}_3$                                                                             | 1D  |   | <b>222F2</b><br>( $C222_1 - P2_1$ ,<br>$T_c = 303$ K) | 1                        | 5.63                                       |            | 5    |
| ( <i>S</i> )-3<br>(Fluoropyrrolidinium)<br>$\text{CdCl}_3$                                                                             | 1D  |   | <b>222F2</b><br>( $C222_1 - P2_1$ ,<br>$T_c = 303$ K) | 1                        | 5.79                                       |            | 5    |
| [( <i>R</i> )-FMQ]Ni(NO <sub>2</sub> ) <sub>3</sub><br>hydroxyquinuclidiniu<br>m) FMQ = <i>N</i> -<br>fluoromethyl-3-<br>Quinuclidinol | 1D  |   | <b>622F2</b><br>( $P2_1$ , $T_c = 405$ K)             | 1                        | 12                                         |            | 6    |

|                                                                                                                                                |    |                                                                                     |                                                                                     |                                                                                                                                       |   |      |    |
|------------------------------------------------------------------------------------------------------------------------------------------------|----|-------------------------------------------------------------------------------------|-------------------------------------------------------------------------------------|---------------------------------------------------------------------------------------------------------------------------------------|---|------|----|
| [( <i>S</i> )-FMQ]Ni(NO <sub>2</sub> ) <sub>3</sub><br>hydroxyquinuclidiniu<br>m) FMQ = <i>N</i> -<br>fluoromethyl-3-<br>Quinuclidinol         | 1D |    |    | <b>622F2</b><br>( <i>P</i> 2 <sub>1</sub> , <i>T</i> <sub>c</sub> = 405 K)                                                            | 1 | 12   | 6  |
| (DFPIP) <sub>4</sub> AgBiI <sub>8</sub>                                                                                                        | 1D |    |    | <b>222F2</b><br>( <i>C</i> 2 - <i>C</i> 222,<br><i>T</i> <sub>c</sub> = 422 K)                                                        | 1 |      | 7  |
| ( <i>R</i> -CYHEA)PbI <sub>3</sub>                                                                                                             | 1D |    |    | <b>222F2</b><br>( <i>P</i> 2 <sub>1</sub> - <i>P</i> 2 <sub>1</sub> 2 <sub>1</sub> 2 <sub>1</sub> ,<br><i>T</i> <sub>c</sub> =373 K)  | 1 | 1.2  | 8  |
| ( <i>S</i> -CYHEA)PbI <sub>3</sub>                                                                                                             | 1D |    |    | <b>222F2</b><br>( <i>P</i> 2 <sub>1</sub> - <i>P</i> 2 <sub>1</sub> 2 <sub>1</sub> 2 <sub>1</sub> ,<br><i>T</i> <sub>c</sub> = 373 K) | 1 | 1.2  | 8  |
| A <sub>4</sub> M <sup>I</sup> M <sup>III</sup> (NO <sub>3</sub> ) <sub>8</sub><br>A = organic cation<br>MI = alkaline metal or<br>ammonium ion | 2D |    |    | <b>222F2</b><br>( <i>P</i> 2 <sub>1</sub> - <i>B</i> 222,<br><i>T</i> <sub>c</sub> = 320 K)                                           | 1 | 3.0  | 9  |
| MIII = rare-earth ion<br><i>s</i> -(FBDA)CdCl <sub>4</sub> ( <i>s</i> -<br>FBDA=(2 <i>s</i> )-2-<br>fluorobutane-1,4-<br>diamine)              | 2D |  |  | <b>222F1</b><br>( <i>P</i> 2 <sub>1</sub> - <i>P</i> 222 <sub>1</sub> ,<br><i>T</i> <sub>c</sub> = 391 K)                             | 4 | 1.67 | 10 |
| [C <sub>3</sub> H <sub>7</sub> FN] <sub>3</sub> [SnCl <sub>6</sub> ]Cl                                                                         | 3D |  |  | <b>622F2</b><br>( <i>P</i> 6 <sub>1</sub> - <i>P</i> 6 <sub>1</sub> 22,<br><i>T</i> <sub>c</sub> = 391 K)                             | 1 |      | 11 |
| A(NH <sub>4</sub> )X <sub>3</sub><br>A = divalent organic<br>cation<br>X = Cl, Br, or I                                                        | 3D |  |  | <b>432F3</b><br>( <i>R</i> 3 - <i>P</i> 432,<br><i>T</i> <sub>c</sub> = 448 K)                                                        | 4 | 19   | 12 |
| 1.<br>MDABCO+NH <sub>4</sub> I <sub>3</sub>                                                                                                    | 3D |  |  | <b>432F3</b><br>( <i>R</i> 3 - <i>P</i> 432,<br><i>T</i> <sub>c</sub> = 360 K)                                                        | 4 |      | 12 |
| 2.<br>ODABCO+NH <sub>4</sub> Br <sub>3</sub>                                                                                                   | 3D |  |  | <b>432F2</b><br>( <i>P</i> 2 <sub>1</sub> - <i>P</i> 432,<br><i>T</i> <sub>c</sub> = 384 K)                                           | 6 |      | 12 |
| 3.<br>( <i>R</i> )-3AP+NH <sub>4</sub> Br <sub>3</sub>                                                                                         | 3D |  |  | <b>432F2</b><br>( <i>P</i> 2 <sub>1</sub> - <i>P</i> 432,<br><i>T</i> <sub>c</sub> = 384 K)                                           | 6 |      | 12 |
| 4.<br>( <i>S</i> )-3AP+NH <sub>4</sub> Br <sub>3</sub>                                                                                         | 3D |  |  | <b>432F2</b><br>( <i>P</i> 2 <sub>1</sub> - <i>P</i> 432,<br><i>T</i> <sub>c</sub> = 384 K)                                           | 6 |      | 12 |

|                                               |    |                                                                                   |                                                                                   |                                                                     |   |    |
|-----------------------------------------------|----|-----------------------------------------------------------------------------------|-----------------------------------------------------------------------------------|---------------------------------------------------------------------|---|----|
| 5.<br>(R)-3AQ+NH <sub>4</sub> Br <sub>3</sub> | 3D |  |  | <b>432F2</b><br>(P2 <sub>1</sub> - P432,<br>T <sub>c</sub> = 493 K) | 6 | 12 |
| 6.<br>(S)-3AQ+NH <sub>4</sub> Br <sub>3</sub> | 3D |  |  | <b>432F2</b><br>(P2 <sub>1</sub> - P432,<br>T <sub>c</sub> = 493 K) | 6 | 12 |

## References:

- 1 P. F. Li, W. Q. Liao, Y. Y. Tang, W. Qiao, D. Zhao, Y. Ai, Y. F. Yao and R. G. Xiong, *Proc. Natl. Acad. Sci.*, 2019, **116**, 5878-5885.
- 2 P. F. Li, Y. Y. Tang, Z. X. Wang, H. Y. Ye, Y. M. You and R. G. Xiong, *Nat. Commun.*, 2016, **7**, 13635.
- 3 Y. Ai, D. J. Wu, M. J. Yang, P. Wang, W. H. He and W. Q. Liao, *Chem. Commun.*, 2020, **56**, 7033-7036.
- 4 Y. Ai, X.-G. Chen, P.-P. Shi, Y.-Y. Tang, P.-F. Li, W.-Q. Liao and R.-G. Xiong, *J. Am. Chem. Soc.*, 2019, **141**, 4474-4479.
- 5 Y. Y. Tang, Y. Ai, W. Q. Liao, P. F. Li, Z. X. Wang and R. G. Xiong, *Adv. Mater.*, 2019, **31**, e1902163.
- 6 B. B. Deng, C. C. Xu, T. T. Cheng, Y. T. Yang, Y. T. Hu, P. Wang, W. H. He, M. J. Yang and W. Q. Liao, *J. Am. Chem. Soc.*, 2020, **142**, 6946-6950.
- 7 C. F. Wang, H. Li, M. G. Li, Y. Cui, X. Song, Q. W. Wang, J. Y. Jiang, M. M. Hua, Q. Xu, K. Zhao, H. Y. Ye and Y. Zhang, *Adv. Funct. Mater.*, 2021, **31**, 2009457.
- 8 Y. Hu, F. Florio, Z. Chen, W. A. Phelan, M. A. Siegler, Z. Zhou, Y. Guo, R. Hawks, J. Jiang and J. Feng, *Sci. Adv.*, 2020, **6**, eaay4213.
- 9 C. Shi, L. Ye, Z.-X. Gong, J.-J. Ma, Q.-W. Wang, J.-Y. Jiang, M.-M. Hua, C.-F. Wang, H. Yu and Y. Zhang, *J. Am. Chem. Soc.*, 2019, **142**, 545-551.
- 10 W. He, C. Chen, S. Wu, W. P. D. Wong, Z. Wu, K. Chang, J. Wang, H. Gao and K. P. Loh, *J. Am. Chem. Soc.*, 2025, **147**, 811-820.
- 11 G. P. Li, S. Q. Lu, X. Chen, W. Q. Liao, Y. Y. Tang and R. G. Xiong, *Chem. Eur. J.*, 2019, **25**, 16625-16629.
- 12 H.-Y. Ye, Y.-Y. Tang, P.-F. Li, W.-Q. Liao, J.-X. Gao, X.-N. Hua, H. Cai, P.-P. Shi, Y.-M. You and R.-G. Xiong, *Science*, 2018, **361**, 151-155.
